# Supplementary material for: Natural Variation in OASC Gene for Mitochondrial O-Acetylserine Thiollyase Affects Sulfate Levels in Arabidopsis
Source: MDPI journal article supplement (doi:10.3390/plants12010035), 2022-12-21
Supplement: s1 [file s1]

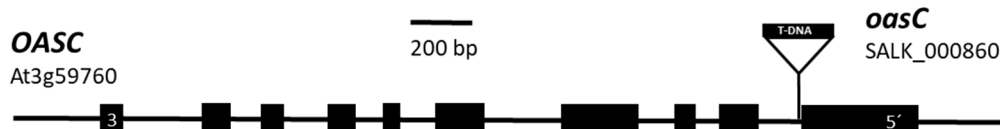

**Supplementary Figure S1.** Scheme of *oasC* T-DNA line.

```

OASC_B.napus      -MAMLMASRFNSEAKIASRFLSTLLRNQRTASSSSSMASASSSSALLLNPLTS---ST
OASC_A.thaliana   MVAMIMASRFNREAKLASQILSTLLGNRSCYTS----MATSSSALLLNPLTSSSSSST
                  ** * * * * * * * * * * * * * * * * * * * * * * * * * *
OASC_B.napus      LRHFRSSPEISSLSFSAS-GFPLGMRSQQSRSYGDVSKRDP--CEAVKLETGADGLNIA
OASC_A.thaliana   LRRFRCSPEISSLSFSASDFFSLAMR-RQSRSFADGSEKDPSSVCEAVKRETPDGLNIA
                  ** ** * * * * * * * * * * * * * * * * * * * * * * * * *
OASC_B.napus      QNVSQQLIGKTPMVYLNLSMAKGCVANIAAKLEIMEPCCSVKDRIGYSMTDAEQKGFISPG
OASC_A.thaliana   DNVSQQLIGKTPMVYLNLSIAKGCVANIAAKLEIMEPCCSVKDRIGYSMTDAEQKGFISPG
                  * * * * * * * * * * * * * * * * * * * * * * * * * *
OASC_B.napus      KSVLVEPTSGNTGIGLAFIAASRGYRLILTMPSSMSMERRVLLKAFGAELVLTDPAGMT
OASC_A.thaliana   KSVLVEPTSGNTGIGLAFIAASRGYRLILTMPASMSMERRVLLKAFGAELVLTDPAGMT
                  * * * * * * * * * * * * * * * * * * * * * * * * * *
OASC_B.napus      GAVQKAEEILKSTPDAYMLQQFDNPANPKIHYETTGPFIWEDTKGKVDIFVAGIGTGGTI
OASC_A.thaliana   GAVQKAEEILKNTPDAYMLQQFDNPANPKIHYETTGPFIWDDTKGKVDIFVAGIGTGGTI
                  * * * * * * * * * * * * * * * * * * * * * * * * * *
OASC_B.napus      TGVGRFIKEQNPKVQVIGVEPTESDILSGGKPGPHKIQGIGAGFIPKNLDRAIMDEVIAI
OASC_A.thaliana   TGVGRFIKEKNPKTQVIGVEPTESDILSGGKPGPHKIQGIGAGFIPKNLDQKIMDEVIAI
                  * * * * * * * * * * * * * * * * * * * * * * * * * *
OASC_B.napus      SSEEAIETAKQLALKEGLMVGISSGAAAAAAIMVAKRPENAGKLIAVVFPSFGERYLSTP
OASC_A.thaliana   SSEEAIETAKQLALKEGLMVGISSGAAAAAAIKVAKRPENAGKLIAVVFPSFGERYLSTP
                  * * * * * * * * * * * * * * * * * * * * * * * * * *
OASC_B.napus      LFQSIREEEVEKMQPEI
OASC_A.thaliana   LFQSIREEEVEKMQPEV
                  * * * * * * * * * *

```

**Supplementary Figure S2.** Protein sequence comparison of *OASC* gene from *B. napus* and *A. thaliana*. Fully conserved residues are indicated in blue asterisks. The amino acid changes related to low sulfate accumulation are marked in red.

**Supplementary Table S1.** OASC haplotypes and sulfate content in *B. napus* varieties.

| Haplotypes      | SNP markers       |                   |                   |                   |                   |                   | Sulfate<br>( $\mu\text{mol/g FW}$ ) |
|-----------------|-------------------|-------------------|-------------------|-------------------|-------------------|-------------------|-------------------------------------|
|                 | JCVI_<br>8073:282 | JCVI_<br>8073:288 | JCVI_<br>8073:354 | JCVI_<br>8073:377 | JCVI_<br>8073:588 | JCVI_<br>8073:649 |                                     |
| D75_INCxCON     | -                 | -                 | R                 | R                 | S                 | C                 | 22.6                                |
| D79_JETN        | -                 | -                 | R                 | R                 | S                 | C                 | 36.9                                |
| A42_Dar         | -                 | -                 | R                 | R                 | S                 | C                 | 27.8                                |
| A136_Roc        | -                 | -                 | R                 | R                 | S                 | C                 | 25.2                                |
| IB28_Cas        | -                 | -                 | R                 | R                 | S                 | C                 | 24.5                                |
| IB37_ColxNic    | -                 | -                 | R                 | R                 | S                 | C                 | 31.7                                |
| IB70_HanxGas    | -                 | -                 | R                 | R                 | S                 | C                 | 39.1                                |
| IB100_Maj       | -                 | -                 | R                 | R                 | S                 | C                 | 23.9                                |
| IB106_MoaR      | -                 | -                 | R                 | R                 | S                 | C                 | 23.6                                |
| TAP             | K                 | C                 | R                 | R                 | -                 | C                 | 35.6                                |
| D128_Q10        | K                 | C                 | R                 | R                 | G                 | M                 | 30.2                                |
| D6_APE          | K                 | C                 | R                 | R                 | S                 | C                 | 31.6                                |
| D7_APExGIN      | K                 | C                 | R                 | R                 | S                 | C                 | 23.5                                |
| D14_Bol         | K                 | C                 | R                 | R                 | S                 | C                 | 24.8                                |
| D26_CAPxMOH     | K                 | C                 | R                 | R                 | S                 | C                 | 22.1                                |
| D74_HURxNAV     | K                 | C                 | R                 | R                 | S                 | C                 | 18.8                                |
| D83_KAR         | K                 | C                 | R                 | R                 | S                 | C                 | 37.9                                |
| D102_MAT        | K                 | C                 | R                 | R                 | S                 | C                 | 21.9                                |
| A11_Bie         | K                 | C                 | R                 | R                 | S                 | C                 | 36.1                                |
| IB23_Can        | K                 | C                 | R                 | R                 | S                 | C                 | 32.2                                |
| IB29_Cat        | K                 | C                 | R                 | R                 | S                 | C                 | 14.2                                |
| IB50_DwaE       | K                 | C                 | R                 | R                 | S                 | C                 | 38.7                                |
| IB73_Hug        | K                 | C                 | R                 | R                 | S                 | C                 | 34.0                                |
| IB99_MadxRec    | K                 | C                 | R                 | R                 | S                 | C                 | 23.4                                |
| IB121_Palu      | K                 | C                 | R                 | R                 | S                 | C                 | 24.6                                |
| IB125_POH285B   | K                 | C                 | R                 | R                 | S                 | C                 | 15.8                                |
| IB139_Sam       | K                 | C                 | R                 | R                 | S                 | C                 | 27.1                                |
| IB151_SloK      | K                 | C                 | R                 | R                 | S                 | C                 | 39.8                                |
| D127_PRI        | K                 | C                 | R                 | R                 | S                 | C                 | 20.7                                |
| D131_Raf        | K                 | C                 | R                 | R                 | S                 | C                 | 29.6                                |
| D132_RAGJ       | K                 | C                 | R                 | R                 | S                 | C                 | 33.7                                |
| D137_ROCxLIZ    | K                 | C                 | R                 | R                 | S                 | C                 | 25.7                                |
| IB133_Ram       | K                 | M                 | R                 | R                 | S                 | M                 | 20.7                                |
| D146_SIBB       | T                 | -                 | A                 | G                 | G                 | M                 | 19.3                                |
| A144_She        | T                 | -                 | R                 | R                 | S                 | M                 | 38.7                                |
| IB21_Cab        | T                 | C                 | R                 | R                 | S                 | C                 | 34.0                                |
| IB52_EngG       | T                 | C                 | R                 | R                 | S                 | C                 | 25.4                                |
| D113_NEWH       | T                 | M                 | -                 | G                 | G                 | M                 | -                                   |
| IB86_LemM       | T                 | M                 | A                 | G                 | G                 | -                 | 30.0                                |
| IB111_N02D_1952 | T                 | M                 | A                 | G                 | G                 | -                 | 27.7                                |
| D3_ALT          | T                 | M                 | A                 | G                 | G                 | M                 | 21.3                                |

|                 |   |   |   |   |   |   |      |
|-----------------|---|---|---|---|---|---|------|
| D4_AMBxCOM      | T | M | A | G | G | M | 18.4 |
| D10_BAL         | T | M | A | G | G | M | 16.5 |
| D31_CES         | T | M | A | G | G | M | 17.4 |
| D39_COR         | T | M | A | G | G | M | 32.6 |
| D46_DIP         | T | M | A | G | G | M | 20.3 |
| D55_EUR         | T | M | A | G | G | M | 13.6 |
| D69_HAN         | T | M | A | G | G | M | 22.1 |
| D108_MON        | T | M | A | G | G | M | 21.9 |
| D170_TIN        | T | M | A | G | G | M | 28.7 |
| D173_TOP        | T | M | A | G | G | M | 18.9 |
| D181_WESD       | T | M | A | G | G | M | 20.1 |
| A18_Bro         | T | M | A | G | G | M | 13.5 |
| A25_Cap         | T | M | A | G | G | M | 25.9 |
| A34_Chua        | T | M | A | G | G | M | 24.1 |
| NIN             | T | M | A | G | G | M | 15.7 |
| A155_Ste        | T | M | A | G | G | M | 21.8 |
| A168_TEM        | T | M | A | G | G | M | 30.4 |
| A176_Ver        | T | M | A | G | G | M | 32.6 |
| A187_Xia        | T | M | A | G | G | M | 14.9 |
| A188_Zho        | T | M | A | G | G | M | 24.8 |
| IB02_AbuN       | T | M | A | G | G | M | 19.5 |
| IB24_CanxCou    | T | M | A | G | G | M | 22.2 |
| IB45_Dim        | T | M | A | G | G | M | 14.8 |
| IB49_Dup        | T | M | A | G | G | M | 17.0 |
| IB53_Erg        | T | M | A | G | G | M | 12.5 |
| IB58_Exp        | T | M | A | G | G | M | 23.2 |
| IB60_Fla        | T | M | A | G | G | M | 25.4 |
| IB91_LicxExp    | T | M | A | G | G | M | 25.7 |
| IB110_N01D_1330 | T | M | A | G | G | M | 23.3 |
| IB120_Palm      | T | M | A | G | G | M | 26.1 |
| IB130_Qui       | T | M | A | G | G | M | 28.3 |
| IB141_SenNZ     | T | M | A | G | G | M | 25.1 |
| IB143_ShaxWin   | T | M | A | G | G | M | 24.1 |
| IB178_Vig       | T | M | A | G | G | M | 17.4 |
| IB180_Vis       | T | M | A | G | G | M | 20.1 |
| IB184_Yor       | T | M | A | G | G | M | 20.5 |
| D117_NOR        | T | M | A | G | G | M | 29.2 |
| D134_RAPCR      | T | M | A | G | G | M | 18.3 |
| D182_WILR       | T | M | A | G | G | M | 20.9 |
| IB164_Tai       | T | M | A | G | G | M | 24.1 |
| A135_Reg        | T | M | R | G | G | M | 21.5 |
| IB16_Bra        | T | M | R | R | S | M | 17.8 |
| IB57_Exc        | T | M | R | R | S | M | 16.0 |

**Supplementary Table S2.** SNP markers in *OASC* gene in *B. napus*

| SNP           | P-value               | Mutation       |
|---------------|-----------------------|----------------|
| JCVI_8073:282 | $8.12 \times 10^{-4}$ | Synonymous     |
| JCVI_8073:288 | $3.28 \times 10^{-5}$ | Synonymous     |
| JCVI_8073:354 | $7.99 \times 10^{-5}$ | Synonymous     |
| JCVI_8073:377 | $4.87 \times 10^{-5}$ | Non-synonymous |
| JCVI_8073:588 | $1.95 \times 10^{-4}$ | Synonymous     |
| JCVI_8073:649 | $2.05 \times 10^{-5}$ | Synonymous     |

**Supplementary Table S3.** Primers used for qPCR and cloning

| qPCR        | Gene      | Locus     | Forward                  | Reverse                 |
|-------------|-----------|-----------|--------------------------|-------------------------|
|             | UBC       | AT5G25760 | ctgcgactcaggaatcttc      | ttgtgccattgaattgaacc    |
|             | APR1      | At4G04610 | cgatcaagtatccgtctgagaa   | ggacaagattcaagaacgaagt  |
|             | APR2      | At1G62180 | aaaagagctccacgggctat     | cgacatgagtgaatcaacatctc |
|             | APR3      | AT4G21990 | ccaatcaagtatccatcagagaag | ccgaacaagattcaagaaagatg |
|             | SDI1      | AT5G48850 | tccctgtggagacactcctt     | ccatctccgggttcttctct    |
|             | GGCT2;1   | AT5G26220 | tccaccggagctatttgc       | cgttccaagtactccattgct   |
|             | OAS-TL A  | At4G14880 | gaacagaacgcaaacgtcaa     | tcttgtgaggacctggcttc    |
|             | OAS-TL B  | At2G43750 | tttgatctggctattgtagatga  | tccagaagatataccaaccaaaa |
|             | OAS-TL C  | At3G59760 | tgctggaaaactcatagctgtt   | acctcaggctgcattttctc    |
|             | OAS-TL C1 | At3G61440 | aatctaaaaacccaatgtcaaga  | tgccaccgttgagtatgttg    |
| cloning     | OAS-TL C  | At3G59760 | CACCCgacgtgttgatttcagga  | ttaaccgctgactctctca     |
| mutagenesis | OAS-TL C  | At3G59760 | ctagcgatgaGgaggcagag     | ctctgcctcCtcatcgctag    |
